# Supplementary material for: G9a controls pluripotent-like identity and tumor-initiating function in human colorectal cancer
Source: PubMed Central journal article supplement (PMC7878189; doi:10.1038/s41388-020-01591-7), 2020-12-15

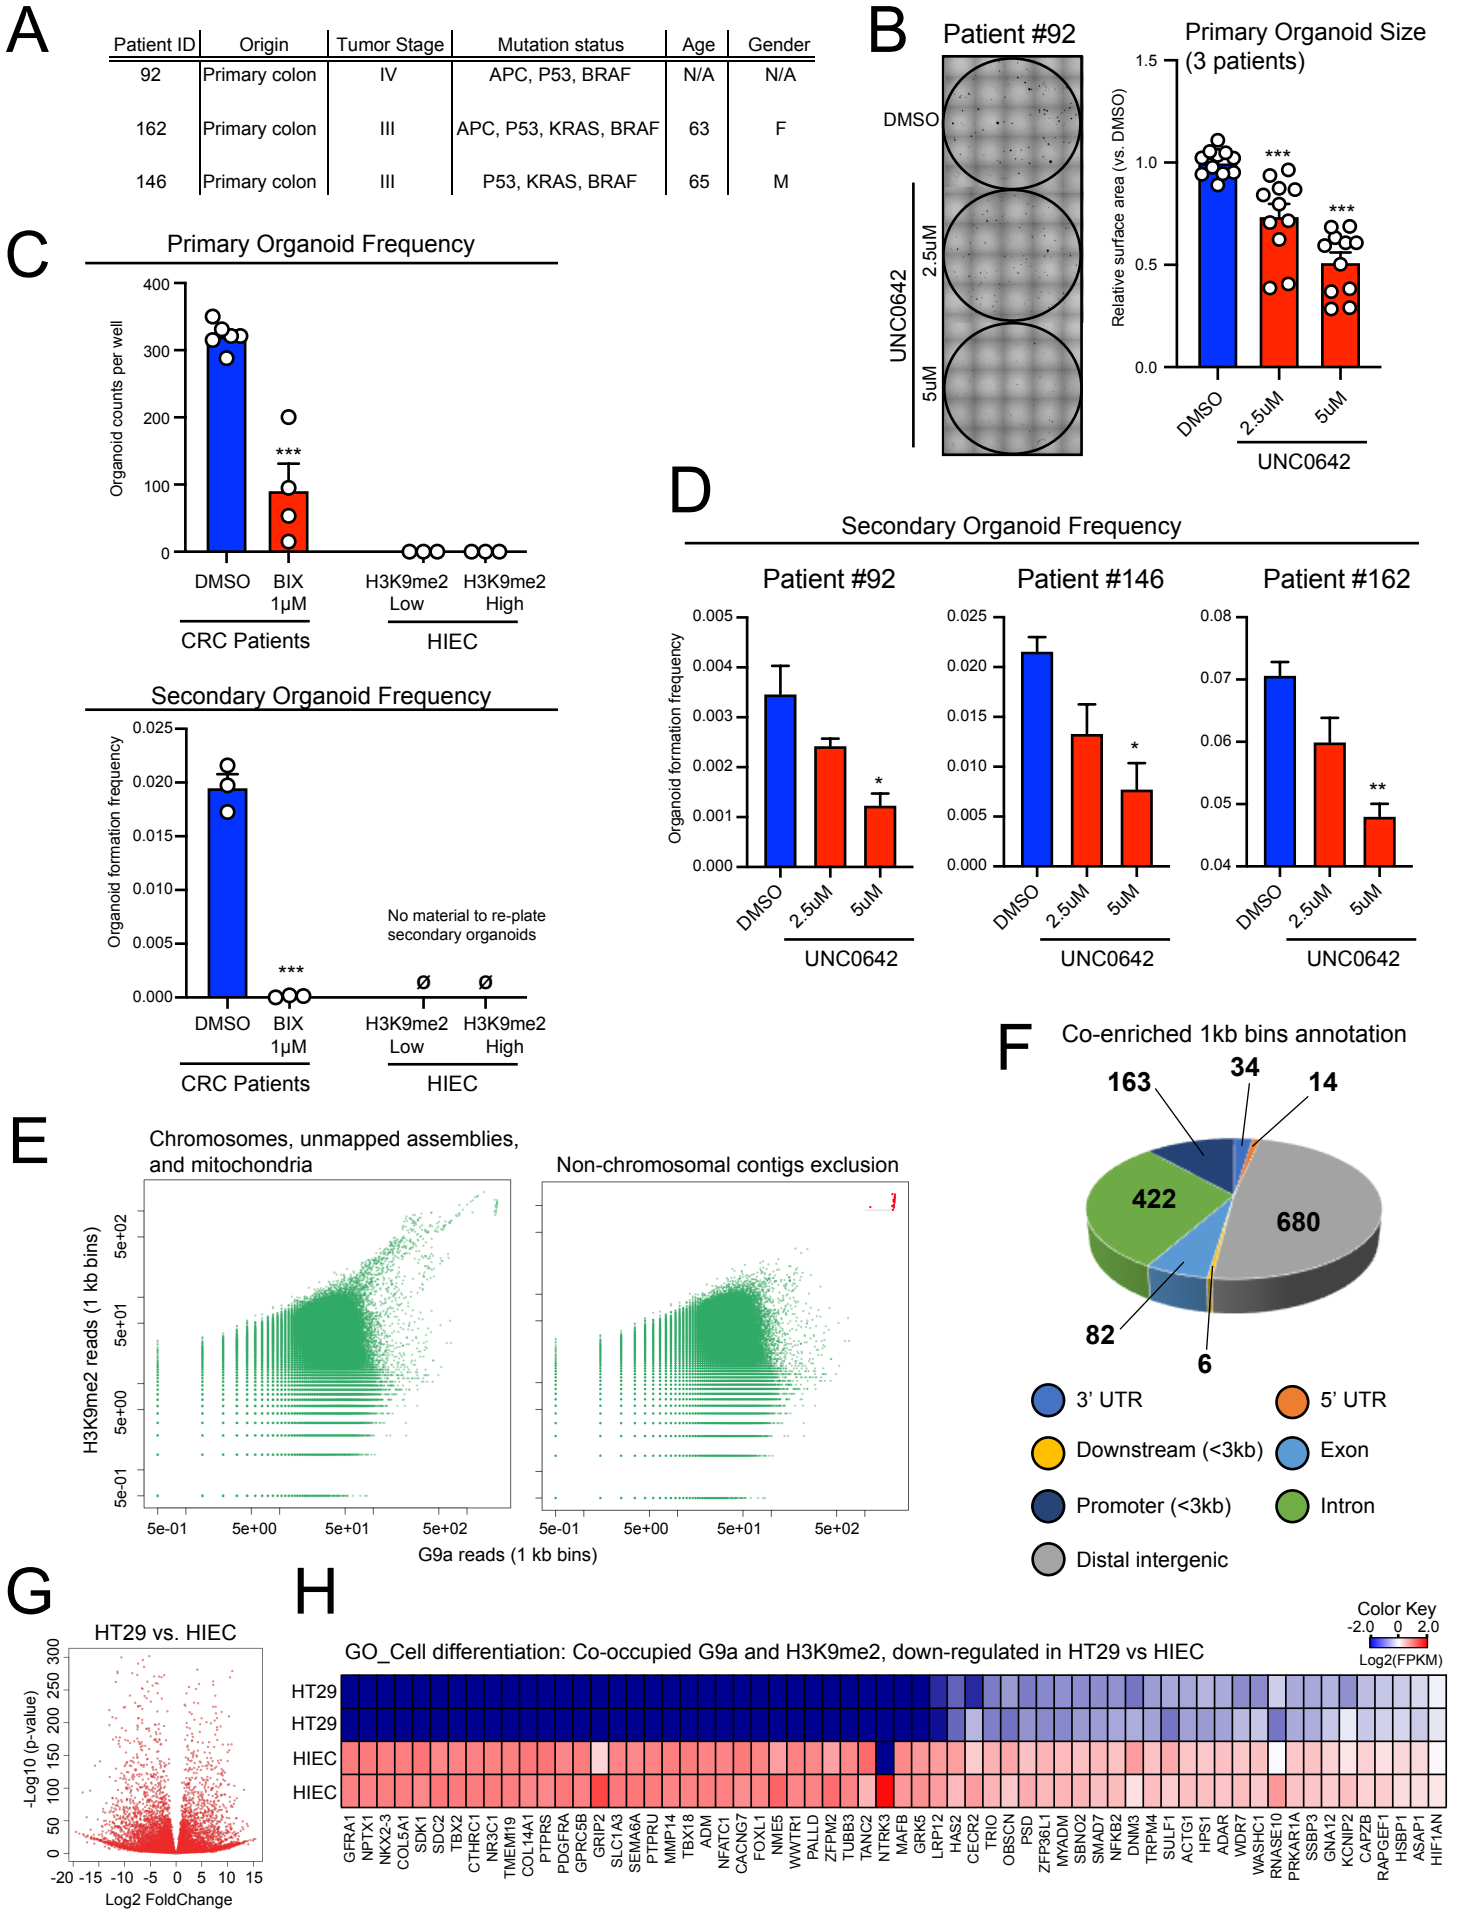

Supplement: 41388_2020_1591_MOESM5_ESM.pdf [file 41388_2020_1591_MOESM5_ESM.pdf]
